# Supplementary material for: Defect-engineering of Pt/Bi4NbO8Br heterostructures for synergetic promotional photocatalytic removal of versatile organic contaminants
Source: Royal Society of Chemistry journal article supplement (doi:10.1039/d0tc04454g), 2021-01-01
Supplement: d0tc04454g1.pdf [file d0tc04454g1.pdf]

## *Supplementary information*

### **Defect-Engineering of Pt/Bi<sub>4</sub>NbO<sub>8</sub>Br Heterostructures for Synergetic Promotional Photocatalytic Removal of Versatile Organic Contaminants**

Liang Shi,<sup>a</sup> Xilu Wu,<sup>a</sup> Chonglei Xu,<sup>b</sup> Qiang Bai,<sup>a</sup> Zhen Nie,<sup>a</sup> Chengcheng Ji,<sup>a</sup> Yelong Zhang,<sup>\*c</sup> Zhengmao Yin,<sup>a</sup> Shuai Zhang,<sup>\*a</sup> Xiaofei Qu<sup>\*a</sup> and Fanglin Du<sup>a</sup>

<sup>a</sup> College of Materials Science and Engineering, Qingdao University of Science and Technology, Zhengzhou Road 53, Qingdao 266042, P. R. China

<sup>b</sup> Key Laboratory of Transparent and Opto-functional Inorganic Materials, Shanghai Institute of Ceramics, Chinese Academy of Sciences, No. 588 Heshuo Road, Shanghai 201899, P. R. China

<sup>c</sup> School of Applied Physics and Materials, Wuyi University, 22 Dongcheng Village, Jiangmen 529020, P. R. China

Corresponding authors:

zhangyelong2008@126.com (Yelong Zhang)

zhangs@qust.edu.cn (Shuai Zhang)

quxiaofei@qust.edu.cn (Xiaofei Qu)

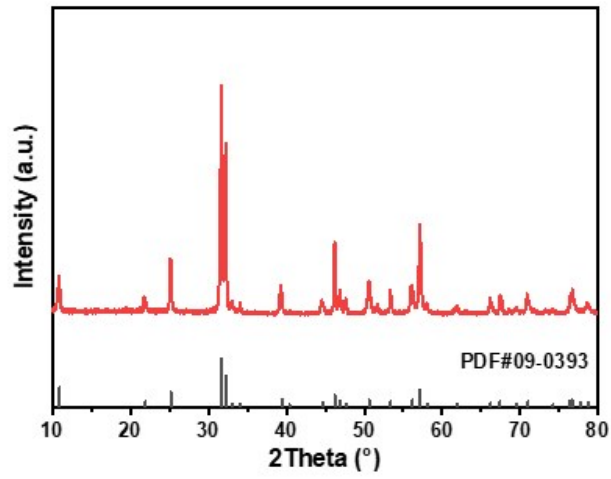

**Figure S1** XRD patterns of as-prepared BiOBr.

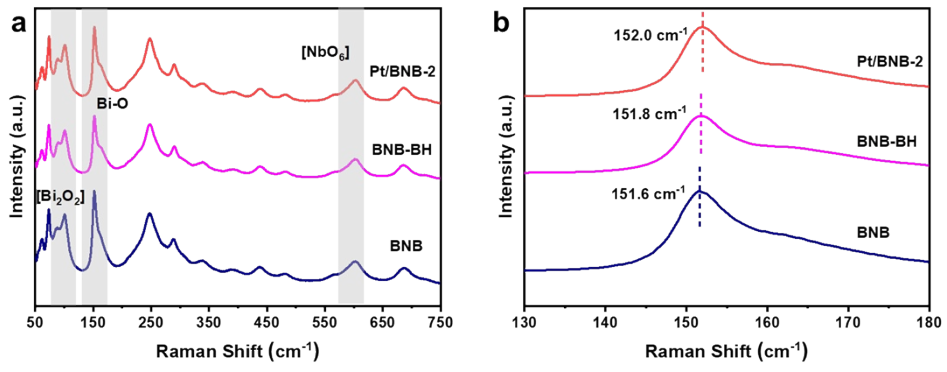

**Figure S2** Raman spectra of BNB, BNB-BH and Pt/BNB-2.

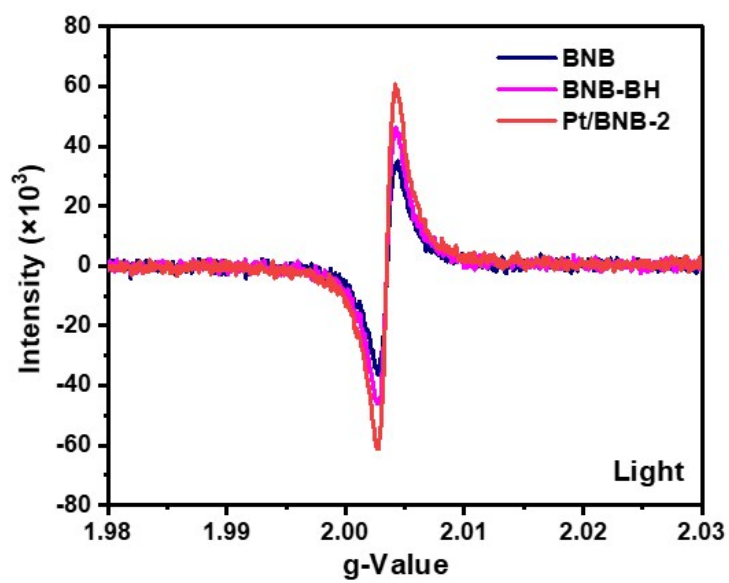

**Figure S3** ESR of BNB, BNB-BH and Pt/BNB-2 under visible-light illumination.

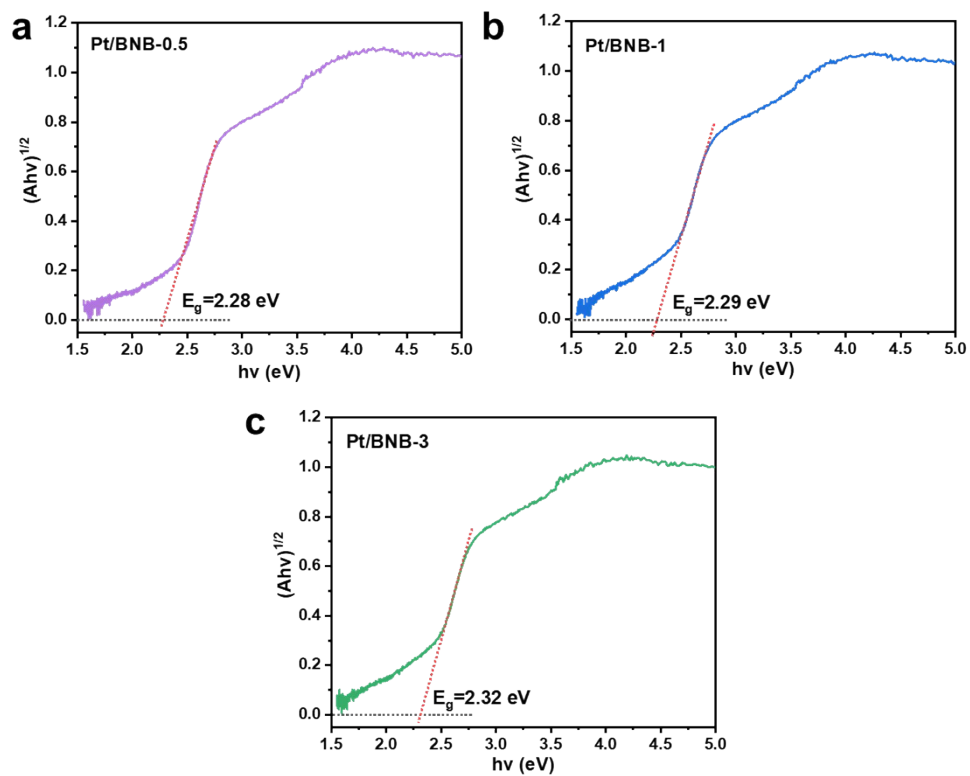

**Figure S4** Tauc plots for the Pt/BNB-0.5, Pt/BNB-1 and Pt/BNB-3 to evaluate band-gap energies.

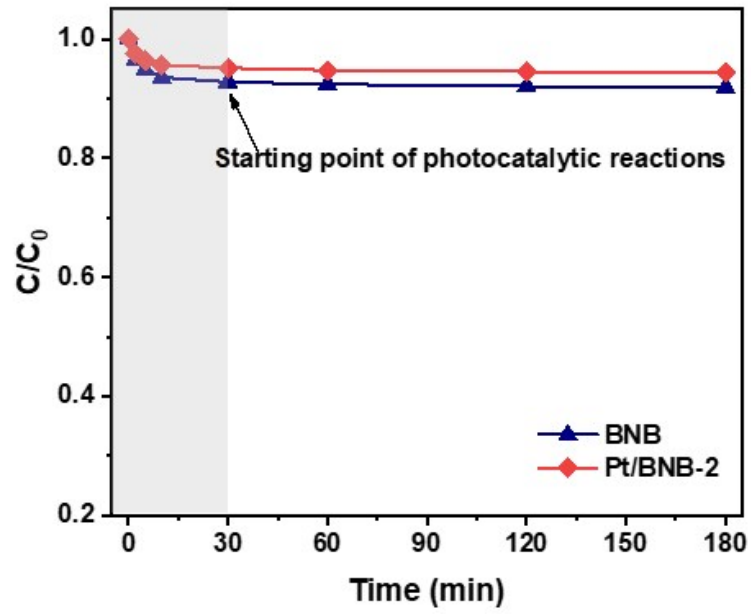

**Figure S5** Adsorption plots for the BNB and Pt/BNB-2 towards MO molecules.  $[MO]_0=15$  mg/L,  
[Cat.] = 1 g/L.

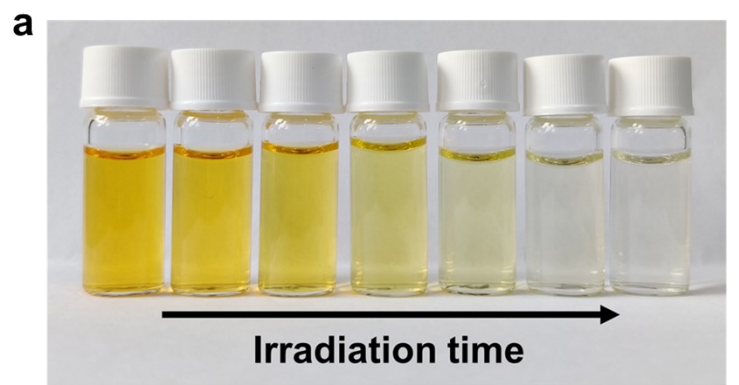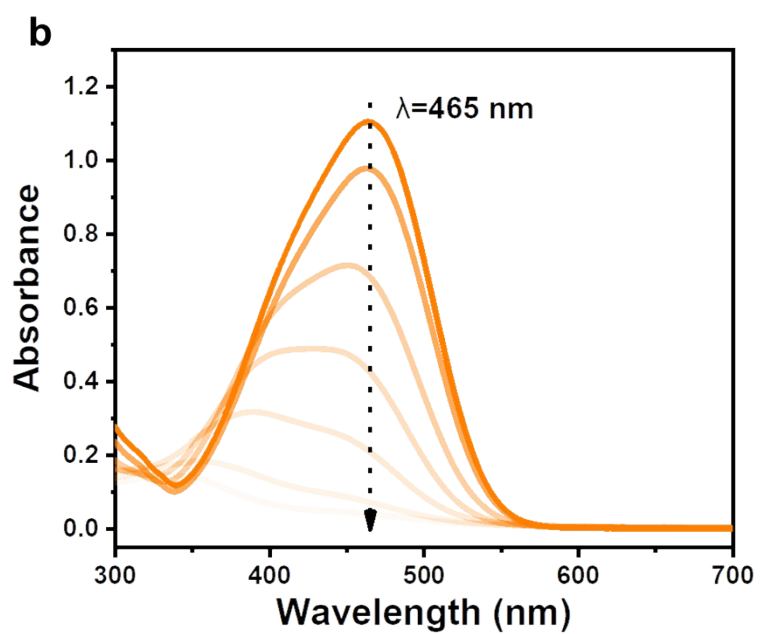

**Figure S6** (a) Digital graphs and (b) corresponding UV-vis absorption plots for the degradation process of MO solution.

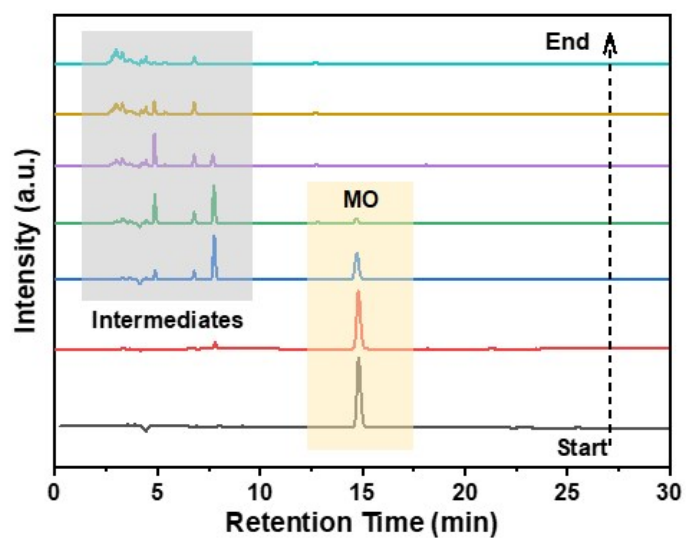

**Figure S7** HPLC analysis for the products in the photocatalytic reactions of MO degradation.



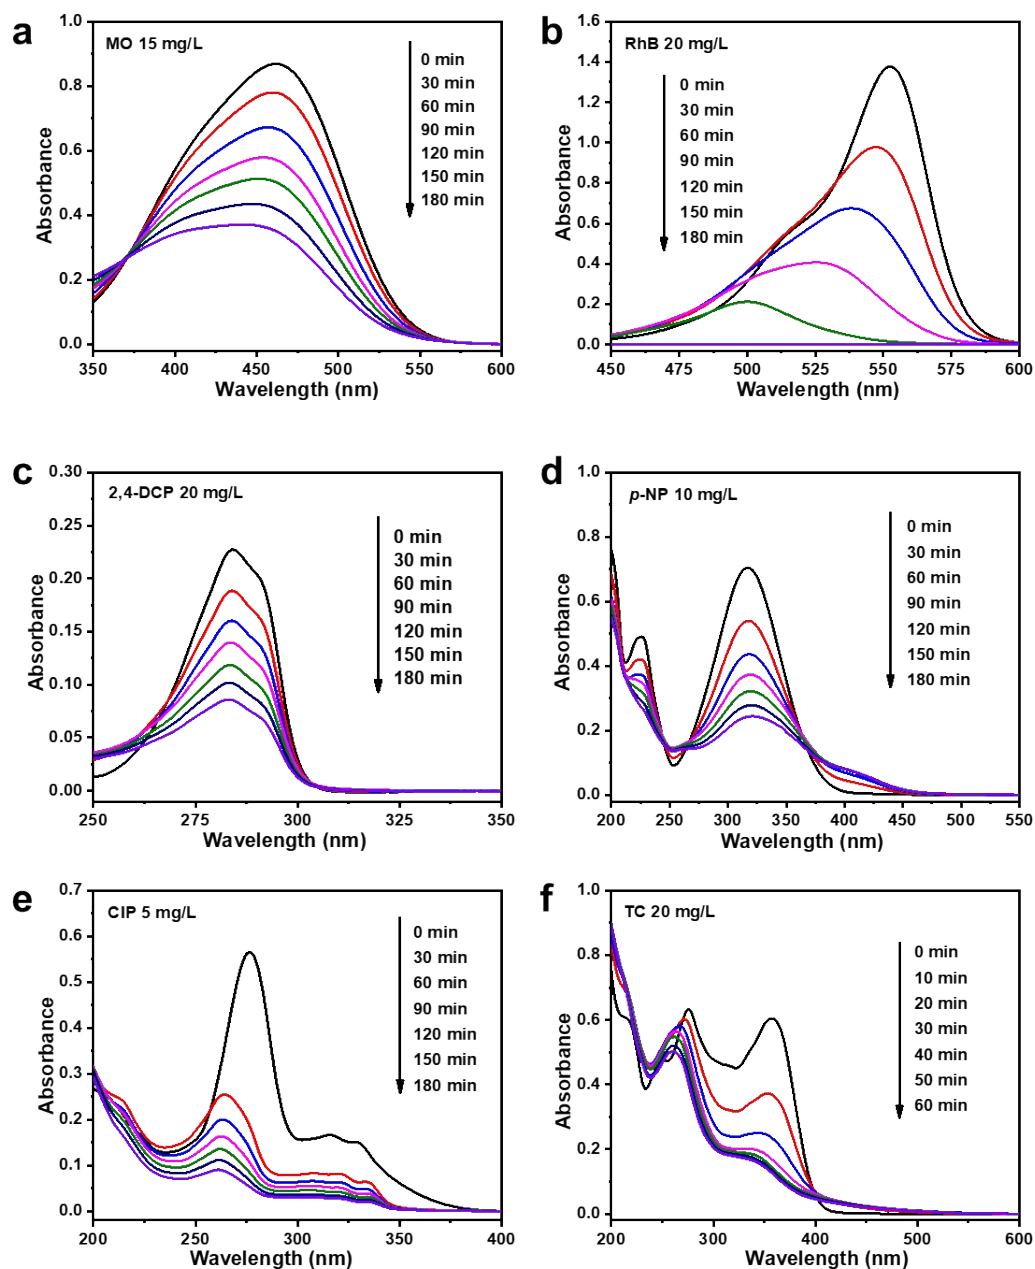

**Figure S8** Plots of photocatalytic removal for various organic pollutants by Pt/BNB-2 (a) methyl orange (b) rhodamine B (c) 2,4-dichlorophenol (d) *p*-nitrophenol (e) ciprofloxacin and (f) tetracycline hydrochloride.

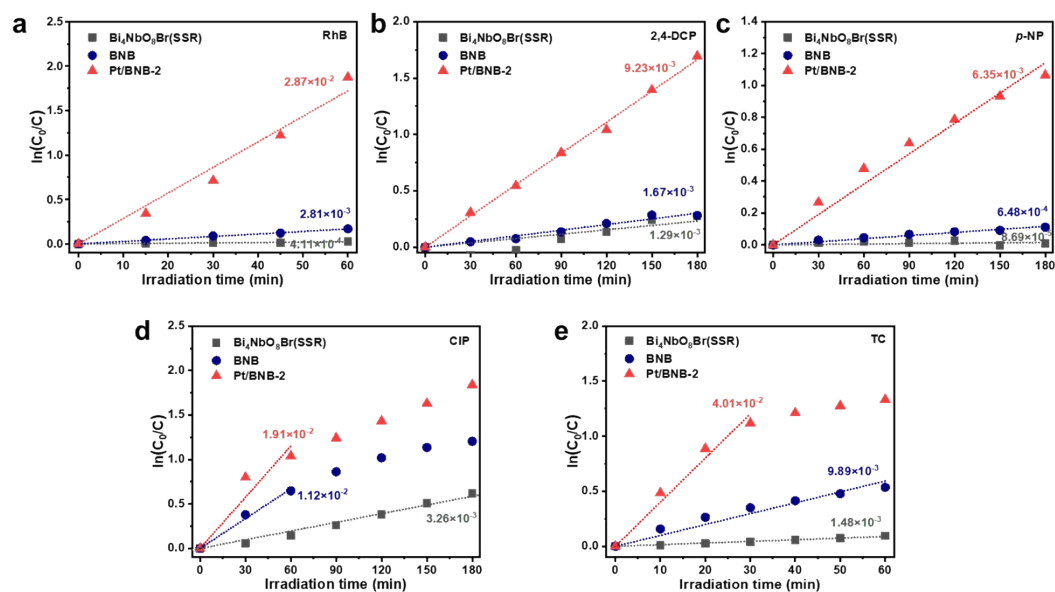

**Figure S9** Pseudo-first-order kinetic fitting plots of photocatalytic removal for organic pollutants by  $\text{Bi}_4\text{NbO}_8\text{Br}$  (SSR), BNB and Pt/BNB-2 (a) RhB (b) 2,4-DCP (c) p-NP (d) CIP and (e) TC.

*\*Fractional data were adopted for the pseudo-first-order kinetic fitting for the (d) CIP and (e) TC, as Pt/BNB-2 possessed exceptional degradation rate than the others.*
